# Supplementary material for: Network pharmacology and experiments in vitro reveal that the Paeonia veitchii Lynch and its active ingredient Punica granatum Linn ameliorate IMQ-induced psoriasis in mice via TLR4/NF-κB signaling pathway
Source: Research Square preprint supplement (doi:10.21203/rs.3.rs-4186847/v1), 2024-04-05
Supplement: Supplementary file 1 [file 2442330fd5d0808d9202dfa2.docx]

**Highlights**

- In terms of methodology, bioinformatics, network pharmacology and molecular docking were integrated to validate the above results by constructing in vitro models.
- External gene sets were used to verify the results of biogenesis.
- Analysis of immune infiltration in psoriasis has led to a better understanding of the pathogenesis of psoriasis.
