# Supplementary material for: Network pharmacology and experiments in vitro reveal that the Paeonia veitchii Lynch and its active ingredient Punica granatum Linn ameliorate IMQ-induced psoriasis in mice via TLR4/NF-κB signaling pathway
Source: Research Square preprint supplement (doi:10.21203/rs.3.rs-4186847/v1), 2024-04-05
Supplement: Supplementary file 2 [file 24a7e61e5a15467d8843434f.docx]

**缩写表**

| 缩略词 | 英文全称 | 中文全称 |
| --- | --- | --- |
| IMQ | Imiquimod | 咪喹莫特 |
| TLR4 | Toll-like receptor 4 | Toll样受体4 |
| NF-κB | Nuclear factor kappa-B | 核因子 κB |
| EA | Ellagic acid | 鞣花酸 |
| GEO | Gene Expression Omnibus data base | 高通量基因表达数据库 |
| GO | Gene Ontology | 基因本体论 |
| KEGG | Encyclopedia of Genomes | 京都基因与基因组百科全书 |
| PPI | Protein-protein interaction | 蛋白质-蛋白质相互作用 |
| PASI | Psoriasis Area and Severity Index | 银屑病面积和严重程度指数 |
| IL-6 | Interleukin 6 | 白介素6 |
| TNF-α | Tumor Necrosis Factor-α | 肿瘤坏死因子-α |
| CCNB1 | Cyclin B1 | 细胞周期蛋白B1 |
| CXCL8 | C-X-C motif chemokine ligand 8 | 趋化因子配体8 |
| PCNA | Proliferating Cell Nuclear Antigen | 增殖细胞核抗原 |
| S100A9 | S100 calcium binding protein A9 | S100钙结合蛋白A9 |
| PSO | Psoriasis | 银屑病 |
| KCs | Keratinocytes | 角质形成细胞 |
| DCs | Dendritic cells | 树突状细胞 |
| SPF | Specific Pathogen Free | 无特定病原体 |
| DEG s | Differentially co-expressed genes | 差异共表达基因 |
| WGCNA | Weighted gene co-expression network analysis | 加权基因共表达网络分析 |
| BP | Biological processes | 生物过程 |
| MF | Molecular functions | 分子功能 |
| CC | Cellular components | 细胞成分 |
| MCC | MatthewsCorrelationCoefficient | 马修斯相关系数 |
| EPC | Edge Percolated Component | 边缘渗透组件 |
| TCM | Traditional Chinese medicine | 中国传统医学 |
| TCMSP | Traditional Chinese Medicine Systems Pharmacology | 中药系统药理学 |
| OB | Oral bioavailability | 口服生物利用度 |
| DL | Drug likeness | 类药性 |
| HE | Hematoxylin and Eosin | 苏木精和伊红 |
| BCA | Bicinchoninic Acid | 二喹啉甲酸 |
| CD8 | Cluster of differentiation 8 | 白细胞分化抗原 |
| NK | Natural killer | 自然杀伤细胞 |
